# Supplementary material for: Dehydroascorbic Acid Affects the Stability of Catechins by Forming Conjunctions
Source: PubMed Central journal article supplement (PMC7570458; doi:10.3390/molecules25184076), 2020-09-07
Supplement: molecules-25-04076-s001.pdf [file molecules-25-04076-s001.pdf]

---

Table 1 Abbreviations and full name of substances

---

| Abbreviation | Full Name                    |
|--------------|------------------------------|
| AA           | Ascorbic acid                |
| DHAA         | Dehydroascorbic acid         |
| EGCG         | (-)-Epigallocatechin gallate |
| EC           | (-)-Epicatechin              |
| ECG          | (-)-Epicatechin gallate      |
| EGC          | (-)-Epigallocatechin         |
| GA           | Gallic acid                  |
| GCG          | Gallocatechin gallate        |
| DKG          | 2,3-diketogulonic acid       |
| TFs          | Theaflavins                  |
| TSs          | Theasinensins                |
| GTC          | Green tea catechins          |
| TP           | Tea polyphenols              |

---
